# Supplementary material
Source: PubMed Central journal article supplement (PMC4839275)
Supplement: NIHMS706811-supplement-2.pdf [file NIHMS706811-supplement-2.pdf]

**Supplementary Table 1 – Average and variance for luciferase experiments that were tested for statistical significance**

| <b>Supplementary Fig.</b> | <b>Condition</b>              | <b>Average Relative Luciferase Activity</b> | <b>Standard Deviation</b> | <b>n</b> |
|---------------------------|-------------------------------|---------------------------------------------|---------------------------|----------|
| 4a                        | CRE-DOG <sup>OG</sup> , +GFP  | 997.0                                       | 112.5                     | 18       |
|                           | CRE-DOG <sup>OG</sup> , -GFP  | 51.3                                        | 12.8                      | 14       |
|                           | 121trc + C-CreintG, +GFP      | 1496.3                                      | 138.6                     | 18       |
|                           | 121trc + C-CreintG, -GFP      | 32.1                                        | 10.9                      | 15       |
| 4b                        | 121trc + C-CreintG, +GFP      | 1018.7                                      | 138.9                     | 21       |
|                           | 121trc + C-CreintG, -GFP      | 34.0                                        | 5.7                       | 19       |
|                           | CRE-DOG <sup>OPT</sup> , +GFP | 1111.0                                      | 148.8                     | 21       |
|                           | CRE-DOG <sup>OPT</sup> , -GFP | 21.9                                        | 5.0                       | 21       |
| 5                         | CRE-DOG <sup>OG</sup> , +GFP  | 1624.9                                      | 91.6                      | 12       |
|                           | CRE-DOG <sup>OG</sup> , -GFP  | 107.4                                       | 30.8                      | 12       |
|                           | CRE-DOG <sup>OPT</sup> , +GFP | 1714.1                                      | 107.7                     | 12       |
|                           | CRE-DOG <sup>OPT</sup> , -GFP | 34.6                                        | 3.8                       | 12       |

**Supplementary Table 2 – Summary of Cerebellar and Cortical rAAV FLEX-tdT quantifications (mean +/- s.d.)**

|                                      |             |
|--------------------------------------|-------------|
| <b>CEREBELLUM</b>                    |             |
| <b>Specificity</b>                   |             |
| % tdT+ cells that are GFP+           | 96 ± 2%     |
| <b>Efficiency</b>                    |             |
| % tdT+ cells given GFP+              | 42 ± 10%    |
| % PCs that are tdT+                  | 80 ± 11%    |
| % MLIs that are tdT+                 | 35 ± 12%    |
| % GLIs that are tdT+                 | 51 ± 17%    |
| % tdT cells given GFP+, Cre+:        |             |
| Total                                | 55 ± 26%    |
| PCs                                  | 67 ± 22%    |
| GLIs                                 | 44 ± 27%    |
| <b>Induction</b>                     |             |
| % tdT cells given Cre+:              |             |
| GFP negative brains                  | 1 ± 1%      |
| PCs (GFP+ brains)                    | 67 ± 22%    |
| GLIs (GFP+ brains)                   | 51 ± 21%    |
| <b>% Native GFP given Anti-GFP+</b>  |             |
| PCs                                  | 100%        |
| MLIs                                 | 55 ± 17%    |
| GLIs                                 | 79 ± 13%    |
| <b>Identity of leak cells (tdT+)</b> |             |
| PCs                                  | 27%         |
| MLIs                                 | 32%         |
| GLIs                                 | 10%         |
| GCs                                  | 15%         |
| Astro/BG                             | 13%         |
| Other                                | 2%          |
| <b>CORTEX</b>                        |             |
| <b>Specificity</b>                   |             |
| % tdT+ cells given GFP+              | 98 ± 2%     |
| <b>Efficiency</b>                    |             |
| % tdT+ cells given GFP+              | 68 ± 17%    |
| % tdT+ cells given GFP+, Cre+        | 78 ± 10%    |
| <b>Induction</b>                     |             |
| % tdT cells given Cre+:              |             |
| GFP negative brains                  | 0.3 ± 0.3 % |
| GFP+ brains                          | 17 ± 6 %    |

PCs, Purkinje cells. MLI, molecular layer interneuron. BG, Bergmann glia. Astro, astrocyte. GC, granule cell, GLI, granular layer interneurons. Other, identities include oligodendrocyte, unipolar brush cell, NG2 cell
